# Supplementary material
Source: PubMed Central journal article supplement (PMC3046589)
Supplement: pp.110.166710_1.pdf [file pp.110.166710_1.pdf]

**A**

```

DNA: ATGGATGAGCGCGGGGAGAAGGAGGAGGAGCACGGAGTAGTGGAGGAGGAGACGGCGGCG 60
+1: M D E R G E K E E E H G V V E E E T A A 20
DNA: GTTGTGCTCAAGGAGGTGGAGGTGGAGATGGAGATGGTCCGGCGCTCTGAAGAAGCCTCG 120
+1: V V L K E V E V E M E M V G G S E E A S 40
DNA: GCGGCGCCGCTCCTCCTCGCGCACCCGTGCTCGCTGCTGCAGCTCCTGCTCCGCGCCTGC 180
+1: A A P L L L A H P C S L L Q L L L R A C 60
DNA: GCCGGCTGCCTGGTGCGCCTGCTGCACGGCCACTGCAGCGACGGCGCCAACGACGACCCA 240
+1: A G C L V R L L H G H C S D G A N D D P 80
DNA: AAAGCTGCTGCCGACGACGACGACGCTGCGCCTGAAGCTGCTGCTGCTGCGGGCGGGGGC 300
+1: K A A A D D D D A A P E A A A A A A A G 100
DNA: GATGGCGGCGACAAGGCAGCCACCGTAAGTGTCTGTTCCGAGACCACCGCTTGATATATTTG 360
+1: D G G D K A A T 108
DNA: TCGGTCGTACACGTAACGTACGTACGGTAACCGGTCGGATCGATCATCGTGTAACATGC 420
DNA: ATGCAAACCTTTGCAGTACTTGTACATGCAGGAGGTGTGGGCACTGAGGAGGAGCCGAC 480
+2: Y L Y M Q E V W A V R R R P T 123
DNA: GACGCCCCGCCGTCCGAGAGAAGGTTCCGGTGGCAATGGAGGGAACCACCACTAG 535
+2: T P G R P R E G S G G N G N H H * 140

```

**B**

```

B73: MDERGEKDEE EHGVAEEEMA AVVLKEVEVE MVGGSEEASA APLLLAHPCS 50
GQ: MDERGEK-EE EHGVEEETA AVVLKEVEVE MVGGSEEASA APLLLAHPCS 49

B73: VLQLLLRACA GCLVRLLLHG CSDGDDADPK AAADDDDDAA PEAAAAA-D 99
GQ: LLRLLLRACA GCLVRLLLHY CSDGDDDDPK AAADDDDDAA PEAAAAAAD 99

B73: GGDKAATYLY MQEVWA VRRRPTTPGRPREGSGGNGGNHH* 140
GQ: GGDKAATYLY MQEVWA VRRRPTTPGRPREGSGGNGGNHH* 140

```

**Supplemental Figure 1.** ZmPROPEP1 A, genomic sequence cloned from Zea mays variety Golden Queen (GQ) aligned with the encoded protein. “EKE” motifs in the precursor are shown in maroon, amphipathic helix in green, alternatively spliced amino acids in gold, and ZmPep1 peptide in blue. The intron is shown in grey; B. alignment of cDNA sequence from var. B73 and var. GQ. Differing residues are highlighted in blue. The active ZmPep1 peptide is underlined.

Supplemental Table 1: Primers used for semi-quantitative RT-PCR analysis

| Gene                                     | GenBank #    | Forward primer (5' to 3') | Reverse primer (5' to 3') | Cycles | Amplicon Size (bp) | Reference                        |
|------------------------------------------|--------------|---------------------------|---------------------------|--------|--------------------|----------------------------------|
| ACC Oxidase                              | AY359573     | GATCGACTTCTCCAAGCTG       | TGTAGAAGATGTCCCTCCAGT     | 27     | 281                | Doehlemann <i>et al.</i> , 2008  |
| Actin                                    | J01238       | TCAGCAGGTCTTCTCTTTCTT     | TCCTTCATATTTCCCTTCGTTT    | 33     | 303                | Kirchberger <i>et al.</i> , 2007 |
| Anthranilate Synthase component 2        | NM_001159139 | ATCATTTGCAGACTGTTCTTGA    | ATGAGTCCATCTTCAGTCCAT     | 25     | 288                | none                             |
| Allene oxide cyclase                     | AY488136     | CTTCTACTTCGGAGACTACGG     | TCAGTTGGTGTAGTTGTCGAG     | 27     | 295                | Erb <i>et al.</i> , 2009         |
| Allene oxide synthase                    | AY488135     | ACAAGGTGGAGAAGAAGGAC      | GTCGTTGAGCTTGTGAACT       | 27     | 257                | Erb <i>et al.</i> , 2009         |
| Bx1 Tryptophan Synthase $\alpha$ subunit | NM_001111749 | AGTGAAGCCAAGAACAACAA      | GGGCTTGTAGTACCTTCT        | 25     | 201                | Erb <i>et al.</i> , 2009         |
| Endochitinase A                          | EU963425     | GTTCTTCAACGGCATCAAG       | CGTAGTTGTAGTCCACGAGA      | 33     | 311                | Doehlemann <i>et al.</i> , 2008  |
| Peroxidase                               | AY107804     | CATCTACAACGACACCAACAT     | TAGTTCACGTGGAGCAGGTA      | 27     | 345                | Doehlemann <i>et al.</i> , 2008  |
| PR Protein Precursor                     | BT039519     | GAGAACFCGCCTCAAGACTAC     | GGCGTATTTGTACCACTGTTT     | 34     | 255                | Doehlemann <i>et al.</i> , 2008  |
| Endochitinase PR-4                       | EU968115     | CAGATCTCCTGGAACCTCAAC     | TGGCAGAAGCTGCTTGTAGTAG    | 30     | 263                | Doehlemann <i>et al.</i> , 2008  |
| SerPIN (Serine Proteinase INhibitor)     | NM_001154840 | GGAAGCTAGGAGGAAATCAA      | ATGCAGCAAATATAGCCAAC      | 30     | 162                | Erb <i>et al.</i> , 2009         |
| ZmPROPEP1                                | DY240150     | AGTAGGTGGCTGCCTTGT        | GAGTAGTGGAGGAGGAGACG      | 39     | 294                | none                             |
